# Supplementary material for: A homogeneous intergrown material of LiMn2O4and LiNi0.5Mn1.5O4as a cathode material for lithium-ion batteries
Source: Royal Society of Chemistry journal article supplement (doi:10.1039/c4ta05311g), 2014-12-03
Supplement: c4ta05311g1.pdf [file c4ta05311g1.pdf]

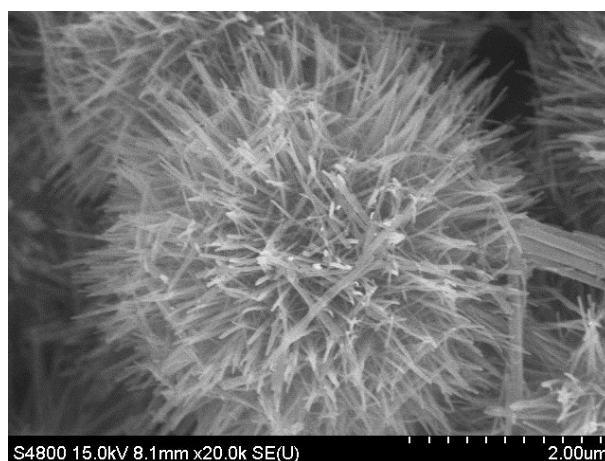

Fig. S1 High magnified image of a single chestnut-like  $\text{MnO}_2\text{-S}$  particle.

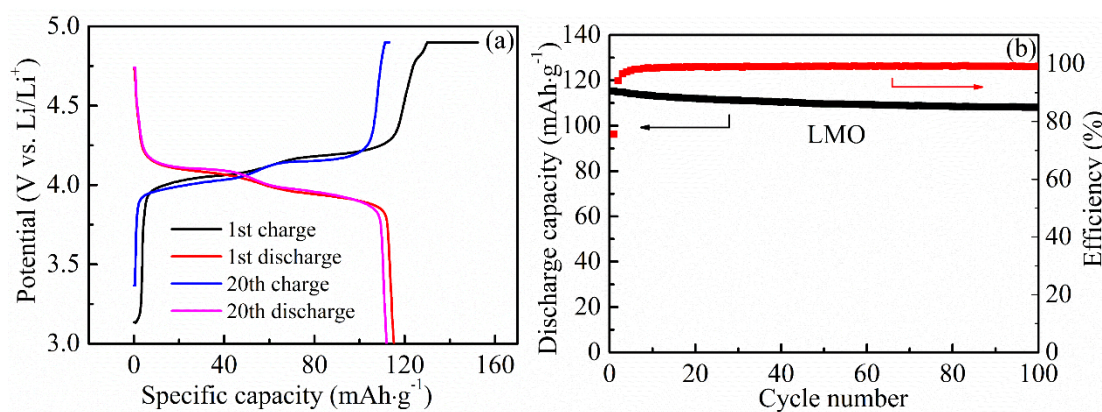

Fig. S2 Electrochemical properties of LMO in the voltage range of 3.0-4.9 V (a) charge-discharge curve, (b) cycle performance at 1 C.
